# Supplementary material for: Formation of the Francisella tularensis Biofilm is Affected by Cell Surface Glycosylation, Growth Medium, and a Glucan Exopolysaccharide
Source: Sci Rep. 2019 Aug 22;9:12252. doi: 10.1038/s41598-019-48697-x (PMC6706388; doi:10.1038/s41598-019-48697-x)
Supplement: Supplementary file 1 — Supporting Information Revised [file 41598_2019_48697_MOESM1_ESM.pdf]

1    **Formation of the *Francisella tularensis* Biofilm is Affected by Cell Surface Glycosylation,**  
2    **Growth Medium, and a Glucan Exopolysaccharide**

3

4

5    Anna E. Champion, Kelly C. Freudenberger Catanzaro, Aloka B. Bandara, and Thomas J. Inzana

6

7

8    **Supporting Information**

9

10

11 **Supplementary Table S1. *Francisella novicida* transposon library mutant strains used.**

| Bacterial Strain      | Locus Tag | Gene Name   | Description                                             |
|-----------------------|-----------|-------------|---------------------------------------------------------|
| tnfn1_pw060328p01q189 | FTN_1420  | <i>wzx</i>  | O antigen flippase                                      |
| tnfn1_pw060323p06q119 | FTN_1421  | <i>wbtH</i> | Glutamine<br>amidotransferase/asparagine<br>synthase    |
| tnfn1_pw060323p06q136 | FTN_1422  | <i>wbtN</i> | Glycosyl transferase, group 1                           |
| tnfn1_pw060323p03q189 | FTN_1423  | <i>wbtG</i> | Glycosyl transferase, group 1                           |
| tnfn1_pw060328p05q111 | FTN_1424  | <i>wzy</i>  | Hypothetical membrane protein                           |
| tnfn1_pw060323p06q161 | FTN_1425  | <i>wbtF</i> | NAD-dependent epimerase                                 |
| tnfn1_pw060328p03q164 | FTN_1426  | <i>wbtE</i> | USD-glucose/GDP-mannose<br>dehydrogenase family protein |
| tnfn1_pw060419p04q192 | FTN_1427  | <i>wbtD</i> | Glycosyl transferase, group 1                           |
| tnfn1_pw060323p03q182 | FTN_1428  | <i>wbtO</i> | Transferase                                             |
| tnfn1_pw060328p05q149 | FTN_1429  | <i>wbyP</i> | Galactosyl transferase                                  |
| tnfn1_pw060419p04q158 | FTN_1430  | <i>wbtQ</i> | Aminotransferase                                        |
| tnfn1_pw060323p06q123 | FTN_1431  | <i>wbtA</i> | dTDP-glucose 4,6-dehydratase                            |

12

13

14

**Supplementary Fig. S1. Glycose composition and linkage analysis of the EPS from *F. tularensis* by gas-chromatography-mass spectrometry (GC-MS).** The purified EPS was permethylated, hydrolyzed, reduced, and acetylated as described in Methods. The methylated alditol acetates were separated on a 30 m Supelco SP-2331 bonded phase fused silica capillary column, and analyzed on an Agilent 7890A GC interfaced to a 5975C mass selective detector. Glycose analysis by GC-MS (top panel) showed that 2 monosaccharides were identified, consisting of 99.9% glucose and 0.1% mannose. Linkage analysis (bottom panel) indicated that 54% of the glucose residues were terminal, 33% were 1,4-linked, and 1.6% were 1,6-linked, which is consistent with amylose. A minor component (4.4%) of the EPS was 1,4-linked mannose.

**Supplementary Fig. S2. Static biofilm development by *F. tularensis* Type A strains in A: MHB or B: CDMB.** Differences in biofilm development between Type A strains SCHUS4 and clinical isolate TI0902 were not significant whether grown in MH medium (A) or CDM medium (B) ( $p > 0.5$ ). However, O-Ag mutant TIGB03 made significantly more biofilm after 5 and 10 days incubation in MH medium ( $p < 0.01$ ), and after 5 days incubation in CDM medium (surface  $p < 0.05$ ). However, the amount of biofilm made by SCHUS4 and TI0902 increased enough by day 10 that there was not a significant difference in biofilm formation. Significance was determined by unpaired  $t$  test.

38 **Supplementary Fig. S3. Surface and broth extractions of LVS strains grown as biofilms.**

39 Each bacterial strain/mutant was grown in CDMB for 25 days, the medium above the biofilm  
40 was removed, the planktonic cells harvested by centrifugation, proteins in the medium  
41 precipitated by addition of 3 volumes of 95% ethanol, and the precipitate resuspended in distilled  
42 water. Planktonic cells in the medium and cells in the biofilm were extracted with 1M urea. The  
43 protein profiles were resolved by SDS-PAGE on 4-12% gels, stained with silver. L: LVS, P:  
44 LVS\_P10, LM: LVSA1423-22, W: WbtIG191V, WM: WbtIG191VΔ1423-22, M: Ladder.

45

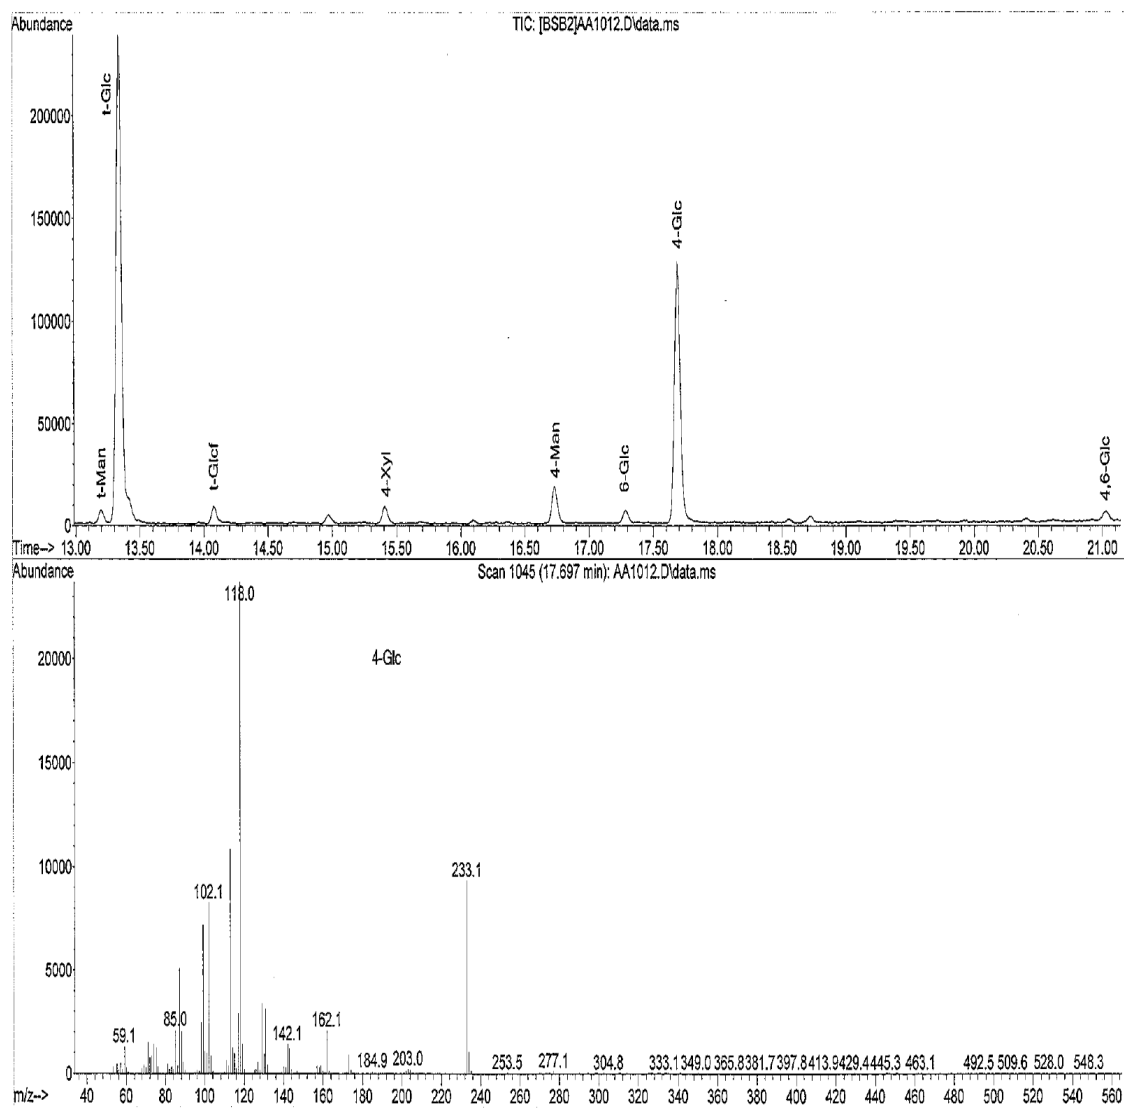

Supplementary Fig. S1.

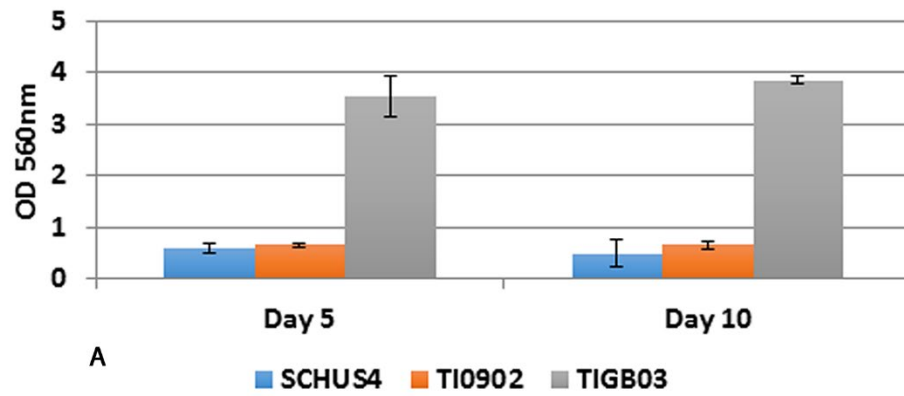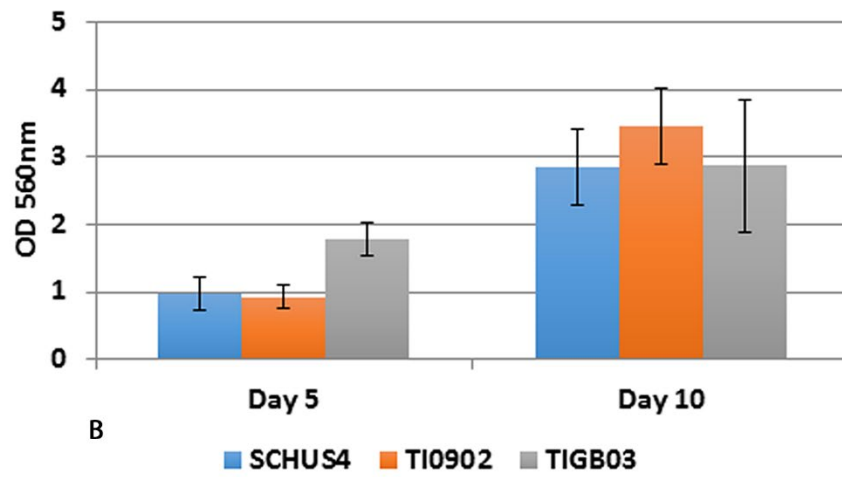

Supplementary Fig. S2.

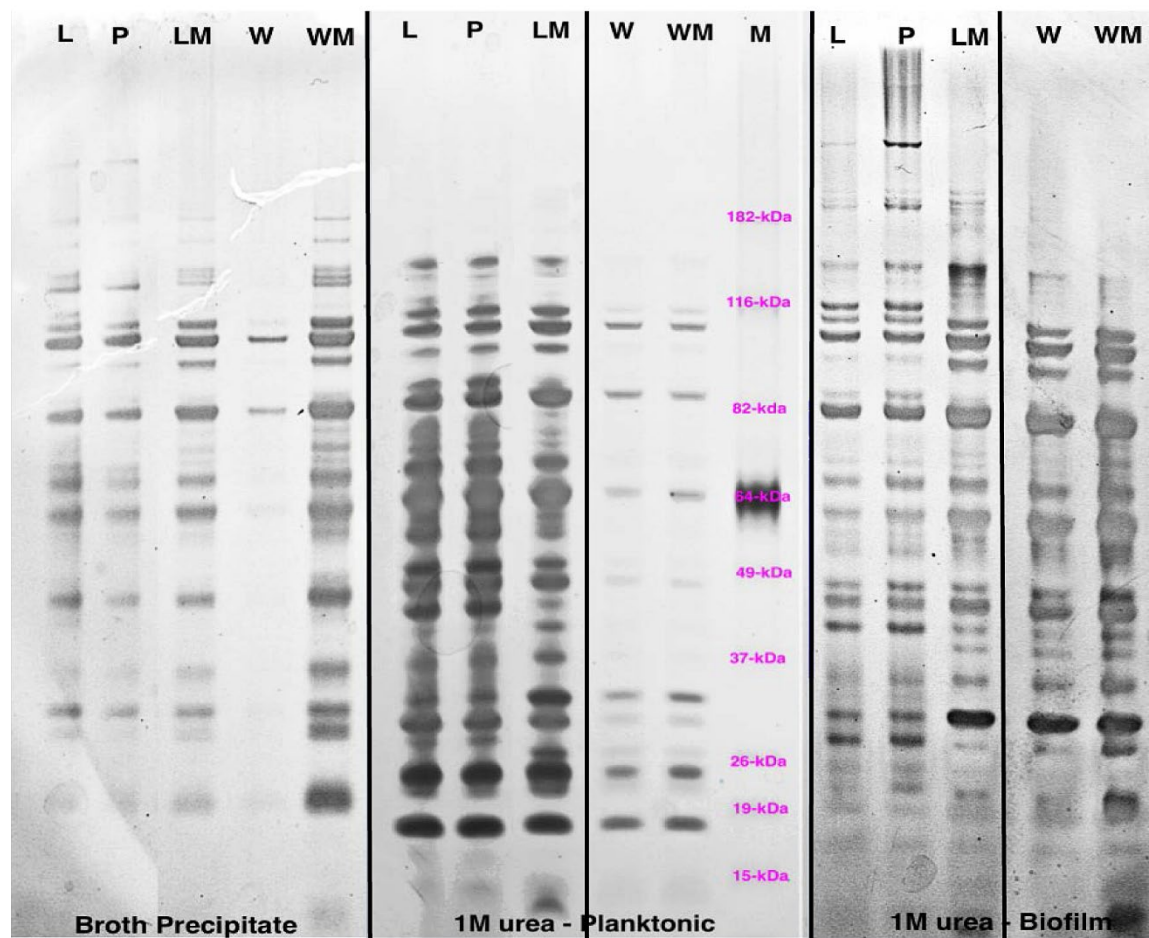

**Supplementary Fig. S3.**
